# Supplementary material for: Physiological and ecological characteristics and reproductive responses of Phragmites australis to dry-wet conditions in inland saline marshes of Northeast China
Source: PeerJ. 2022 Oct 31;10:e14269. doi: 10.7717/peerj.14269 (PMC9632458; doi:10.7717/peerj.14269)
Supplement: Data S1 [file peerj-10-14269-s001.xlsx]

## Sheet: Sheet1
	root length	specific root length	root surface area	specific root surface area	root diameter	root biomass	rhizome shoots	tiller seedlings	aboveground biomass	soluble sugars in stems	soluble sugars in leaves	proline in stems	proline in leaves	Na+ in leaves	K+ in leaves	Ca2+ in leaves	Mg2+ in leaves	Na+ in stems	K+ in stems	Ca2+ in stems	Mg2+ in stems	net photosynthetic rate	transpiration rate	intercellular CO2 concentration	stomatal conductance
	cm	cm·g-1	cm2	cm2·g-1	mm	g	n	n	g	%	%	μg/g	μg/g	mg/kg	mg/kg	mg/kg	mg/kg	mg/kg	mg/kg	mg/kg	mg/kg	µmoL·m-2·S-1	mmoL·m-2·S-1	µmoL·moL-1	mmoL·m-2·S-1
D1	427.77	29.64	41.34	286.5	0.31	0.1443	4	1	1.11	23.02	26.44	164.597	63.4065	5196.03	10434.2	2365.83	1005.83	4497.13	4338.47	4473.07	4445.57	6.57	2.06	125.67	0.04
D1	493.49	49.8	69.58	702.15	0.45	0.0991	4	2	1.13	22.79	26.46	107.788	57.1931	3925.1	7828.22	1816.86	772.75	4584.76	4779.77	3632.79	1021.15	7.63	2.95	194.61	0.07
D1	460.63	37.85	55.46	455.73	0.38	0.1217	7	1	0.69	22.81	26.46	133.973	78.4963	3769.2	7765.51	1745.01	723.2	4723.57	5438.87	3583.81	1014.6	7.58	2.6	132.39	0.05
W1	1617.92	104.99	142.16	922.53	0.28	0.1541	4	4	2.75	21.39	26.44	188.563	133.086	3131.51	2365.72	3392.04	714.42	2844.37	5537.76	1375.11	539.47	16.91	10.58	268.46	0.33
W1	2570.66	151.22	195.11	1147.68	0.25	0.17	0	2	1.53	21.55	26.42	257.798	156.608	3555.59	2852.45	3856.36	895.13	3235.19	6031.15	1498.55	603.23	16.86	9.94	259.64	0.29
W1	2094.29	129.24	168.63	1040.63	0.26	0.16205	4	4	1.87	21.3	26.45	217.855	118.44	4297.96	3277.52	5249.46	964.28	6357.98	14313.1	1186.16	734.8	14.92	11.56	290.24	0.38
DW1	234.06	36.46	34.46	536.81	0.47	0.0642	1	1	0.77	18.98	26.37	221.849	134.861	8404.37	4170.41	3741.04	1404.91	6445.61	4087.86	1580.15	810.9	10.88	4.51	165.02	0.09
DW1	201.73	56.99	22.82	644.56	0.36	0.0354	4	2	0.5	19	26.38	232.501	151.282	8400.37	4100.41	3740	1400.91	5096.94	3074.14	2331.48	677.83	11.8	4.53	144.54	0.09
DW1	104.22	90.63	12.17	1057.83	0.37	0.0370333	1	2	0.73	18.83	26.38	219.186	167.26	8399.37	4139	3739	1399	6964.23	3930.85	1587.67	843.26	11.08	4.14	139.91	0.08
D2	816.43	48.83	108.85	651.01	0.42	0.1672	3	1	0.61	21.02	26.47	590.661	38.109	8051.19	10160.2	1979.61	1166.78	8090.89	2612.21	552.82	376.44	11.91	3.09	60.67	0.07
D2	531.14	31.32	74.47	439.07	0.45	0.1696	2	1	0.42	21.45	26.47	232.501	31.0079	7886.1	10101.3	1870.56	1147.12	7412.25	2920.25	475.98	332.79	11.93	3.09	59.85	0.07
D2	673.78	40.01	91.66	544.28	0.44	0.1684	3	2	0.61	20.75	26.44	293.747	72.7267	10614.3	14017.6	2453.67	1491.26	7548.92	2894.23	466.98	334.64	11.82	3.08	61.46	0.07
W2	1535.25	121.85	126.36	1002.86	0.26	0.126	6	6	8.22	21.13	26.44	103.794	28.345	4245.37	16404	4647.13	1574.54	4947.28	11053.5	956.06	585.83	32.87	10.76	123.44	0.27
W2	950.87	83.05	85.77	749.04	0.29	0.1145	5	4	3.7	21.53	26.43	124.209	56.3055	3997.15	15930.5	4275.5	1579.35	5688.75	12157.3	1354.33	668.33	30.08	11.73	158.4	0.3
W2	2963.53	85.31	300.84	865.97	0.32	0.3474	4	4	1.6	21.21	26.44	93.1422	89.5917	4544.47	17104.3	4953.06	1562.63	3018.45	5649.81	1365.77	547.64	27.01	8.66	118.07	0.21
DW2	1724.7	91.4	149.74	793.54	0.25	0.1887	2	2	0.79	20.64	26.45	114.445	42.991	7674.67	13890.2	2865.45	1350.94	10620.9	6397.4	1047.6	609.73	26.88	9.06	140.33	0.24
DW2	1104.05	55.87	102.12	516.8	0.29	0.1976	0	4	0.85	20.07	26.45	121.103	125.541	8214.31	3991.58	3572.18	1330.31	9642.9	6085.18	1454.22	593.02	30.71	11.11	148.87	0.29
DW2	1179.13	215.56	69.88	1277.57	0.19	0.147	1	2	0.9	20.66	26.45	98.9119	98.468	5670.58	13989.1	3637.19	1279.35	10358	6216.98	1002.8	590.93	18.28	6.94	153.36	0.17
D3	418.87	21.11	66.07	333.03	0.5	0.1984	12	3	1.98	20.26	26.41	129.979	291.972	11068.5	12958.8	1554.77	1159.04	6904.1	3481.91	667.38	411.08	10.85	2	249.14	0.11
D3	1566.73	18.53	217.07	256.79	0.45	0.8453	11	3	1.45	20.54	26.4	158.827	374.078	10359.9	12170.3	1414.39	1081.04	6705.87	3502.46	497.51	407.3	14.28	4.34	309.02	0.22
D3	992.8	19.02	141.57	271.29	0.47	0.52185	14	2	1.04	20.19	26.41	104.238	221.405	10132.5	12161.1	1366.75	978.56	6768.55	3577.98	440.42	403.76	15.19	3.58	270.81	0.17
W3	10193.7	129.89	639.56	814.93	0.2	1.36715	68	12	10.65	21.56	26.48	759.311	185.9	3905.15	15368.9	4290.11	1547.62	4652.91	10469.6	1702.48	784.08	15.5	3.55	284.72	0.19
W3	12348.2	128.64	771.57	803.8	0.2	0.9599	49	7	4.33	21.75	26.48	984.77	121.99	3098.2	12738.5	3534.1	1331.71	3736.54	8299.95	1249.33	633.36	18.51	5.16	313.42	0.3
W3	11271	129.2	705.56	808.81	0.2	1.16352	59	9.5	7.49	22.02	26.48	840.085	163.265	4463.36	17535.5	4553.89	1582.55	4245.21	9628.13	1514.49	706.19	25.01	4.98	276.51	0.3
DW3	6581.83	89.2	569.73	772.09	0.28	0.7379	10	6	1.43	21.7	26.45	74.9458	63.4065	5894.32	14572.1	3852.23	1370.02	5186.57	6384.79	1023.28	418.95	19.06	4.28	250.96	0.19
DW3	2267.03	31.4	263.68	365.26	0.37	0.7219	32	6	3.06	21.47	26.45	52.7549	67.1931	6651.43	16150.9	4263.09	1514.12	5981.69	7445.44	1187.5	503.55	20.25	4.39	241.54	0.2
DW3	606.13	66.03	72.65	791.4	0.38	0.5172	22	4	2.08	21.83	26.44	49.2044	58.4963	10822.7	5451.46	4580.21	1657.59	5938.74	7267	1157.42	489.26	22.31	4.55	223.13	0.19
D4	323.25	36.12	42.88	479.07	0.42	0.191	17	3	2.02	21.22	26.44	87.8164	100.243	6313.02	5191.01	1962.9	1125.47	5650.48	2935.54	501.78	303.02	0	0	0	0
D4	397.03	20.79	66.74	349.43	0.54	0.1114	5	3	1.96	21.45	26.44	106.457	40.7719	7497.27	6366.05	2284.59	1353.49	7443.27	3750.34	646.02	384.08	0	0	0	0
D4	537.44	48.24	47.99	430.81	0.28	0.130633	3	3	2.28	21.62	26.44	94.4737	70.5076	7278.32	5886.57	2048.72	1159.74	6000.05	3090.93	518.5	314.69	0	0	0	0
W4	7294.96	63.74	686.03	599.47	0.31	1.1444	58	22	6.52	21.41	26.44	216.523	189.894	3336.92	13216.8	4086.36	1188.97	3439.6	4785.02	765.04	353.97	15.99	5.46	296.49	0.23
W4	6549.42	60.77	572.05	530.76	0.27	1.0778	21	8	2.34	21.07	26.42	184.568	222.293	4047.34	15757.1	5028.44	1434.28	4462.25	6287.64	989.6	462.7	8.34	4.42	333.25	0.17
W4	6922.19	62.3	629.04	566.14	0.29	1.1111	33	11	1.91	21.66	26.43	195.664	179.243	4391.33	16493.3	4983.67	1386.74	4627.9	6655.04	1288.7	464.33	12.17	4.94	314.87	0.2
DW4	4575.88	77.19	391.95	661.18	0.27	0.5928	32	21	7.24	22.72	26.46	997.196	127.76	3596.6	10387.6	4133.58	1190.7	5928.21	6071.06	1316.58	524.67	6.94	3.46	319.55	0.12
DW4	6028.06	87.19	528.17	763.91	0.28	0.6914	12	15	2.21	23.13	26.47	1023.83	123.766	2397.74	8452.48	3815.52	1406.7	6501.56	6711.68	1178.68	557.99	17.76	5.46	248.31	0.18
DW4	5301.97	82.57	460.06	716.49	0.27	0.6421	6	10	2.7	23.32	26.48	961.691	104.681	4307.75	12913.1	4592.08	1253.52	5566.94	5751.53	936.29	477.82	12.35	4.46	283.93	0.15
